# Supplementary material
Source: HighWire-hosted journal article supplement (http://ajnr-stage2.highwire.org/highwire/filestream/52809/field_highwire_adjunct_files/0/15-00689.pdf)
Supplement: 15-00689.pdf [file 15-00689.pdf]

**On-line Table: Lesion intensity and in-plane size<sup>a</sup>**

|                    | Lesion-Diameter Group |       |     | Lesion-Intensity Category |       |       |
|--------------------|-----------------------|-------|-----|---------------------------|-------|-------|
|                    | AD1                   | AD2   | AD3 | I1                        | I2    | I3    |
| Axial              | 106                   | 300   | 43  | 51                        | 201   | 197   |
| Axial and sagittal | 49                    | 188   | 40  | 31                        | 117   | 129   |
|                    | 46.2%                 | 62.7% | 93% | 60.8%                     | 58.2% | 65.5% |

<sup>a</sup> Data are detection rates of lesions dependent on their in-plane size and intensity. The AD of each lesion was assessed (AD1 < 0.3 cm, AD2 = 0.3–0.5 cm, AD3 > 0.5 cm), and lesions were grouped according to their intensity (I1 = low intensity, I2 = intermediate intensity, I3 = high intensity relative to CSF).
